# Supplementary material for: Connectivity to the surface determines diversity patterns in subsurface aquifers of the Fennoscandian shield
Source: PubMed Central journal article supplement — ISME J. 2016 Mar 29;10(10):2447–58. doi: 10.1038/ismej.2016.36 (PMC5030689; doi:10.1038/ismej.2016.36), 2016-03-29
Supplement: ismej201636x1.pdf [file ismej201636x1.pdf]

Supplementary File 1: Sampling details

| <b>Aquifer</b> | <b>Sampling date</b> | <b>Volume [mL]</b> | <b>DNA ng/<math>\mu</math>L</b> |
|----------------|----------------------|--------------------|---------------------------------|
| 1327B          | September 6, 2006    | 250                | 3.4                             |
| 1327B          | January 22, 2007     | 800                | 12.3                            |
| 1327B          | January 22, 2007     | 250                | 1.2                             |
| 1327B          | March 29, 2007       | NA                 | 20.5                            |
| 1327B          | March 29, 2007       | 250                | 0.9                             |
| 1327B          | April 15, 2008       | NA                 | 50.7                            |
| 1327B          | May 13, 2009         | 5000               | 34.7                            |
| 1327B          | May 13, 2009         | 250                | 1.4                             |
| 1327B          | November 11, 2009    | 250                | 3.5                             |
| 1327B          | March 11, 2010       | NA                 | 43.1                            |
| 1327B          | March 11, 2010       | 250                | 37.5                            |
| 1327B          | November 18, 2010    | 250                | 51.1                            |
| 1327B          | April 25, 2012       | 250                | 1.4                             |
| 2156B          | May 16, 2006         | 250                | 2.4                             |
| 2156B          | July 19, 2006        | 250                | 7.5                             |
| 2156B          | September 7, 2006    | 250                | 2.5                             |
| 2156B          | January 24, 2007     | 250                | 0.2                             |
| 2156B          | January 24, 2007     | 950                | 2.7                             |
| 2156B          | January 24, 2007     | 250                | 1.1                             |
| 2156B          | March 28, 2007       | 5000               | 150.4                           |
| 2156B          | March 28, 2007       | 250                | 0.3                             |
| 2156B          | April 16, 2008       | NA                 | 13.4                            |
| 2156B          | May 13, 2009         | 5000               | 109.6                           |
| 2156B          | May 13, 2009         | 250                | 0.5                             |
| 2156B          | November 10, 2009    | 250                | 0.9                             |
| 2156B          | March 3, 2010        | NA                 | 6.3                             |
| 2156B          | March 3, 2010        | 250                | 0.8                             |
| 2156B          | November 17, 2010    | 250                | 5.5                             |
| TASF           | September 8, 2006    | 250                | 0                               |
| TASF           | January 24, 2007     | 250                | 0                               |
| TASF           | January 24, 2007     | 5000               | 13.9                            |
| TASF           | March 27, 2007       | 250                | 1                               |
| TASF           | March 27, 2007       | 5000               | 7.1                             |
| TASF           | April 15, 2008       | NA                 | 1.2                             |
| TASF           | May 13, 2009         | 5000               | 34.2                            |
| TASF           | November 10, 2009    | 250                | 1.1                             |
| TASF           | March 3, 2010        | 250                | 4.8                             |
| TASF           | April 24, 2012       | 250                | 0.4                             |
