# Supplementary material for: Connectivity to the surface determines diversity patterns in subsurface aquifers of the Fennoscandian shield
Source: PubMed Central journal article supplement — ISME J. 2016 Mar 29;10(10):2447–58. doi: 10.1038/ismej.2016.36 (PMC5030689; doi:10.1038/ismej.2016.36), 2016-03-29
Supplement: ismej201636x2.pdf [file ismej201636x2.pdf]

Supplementary file 2: Geochemistry table Page 1

| Sicada No. | Location     | Year          | pH    | cond. mS/m | Alkal. µmol/l | Cl µmol/l | Br µmol/l | SO4 µmol/l | F µmol/l | Ca µmol/l |
|------------|--------------|---------------|-------|------------|---------------|-----------|-----------|------------|----------|-----------|
| 6945       | Ä3 1327B     | 19.07.2006    | 7.35  | 983        | 3473          | 86097     | 139.0     | 3456       | 78.4     | 7057      |
| 6956       | Ä4 1327B R0  | 06.09.2006    | 7.35  | 969        | 3458          | 86210     | 290.5     | 7079       | 82.1     | 7146      |
| 14034      | Ä5 1327B R0  | 22.01.2007    | 7.317 | 983        | 3360          | 85928     | 144.4     | 3594       | 83.4     | 7343      |
| 14138      | Ä6-1327B R0  | 29.03.2007    | 7.293 | 978        | 3393          | 86943     | 140.4     | 3562       | 81.1     | 7194      |
| 14483      | Ä8 1327B R0  | 15.04.2008    | 7.31  | 993        | 3348          | 86331     | 154.9     | 3582       | 78.9     | 5555      |
| 14826      | Ä9 1327B R0  | 13.05.2009    | 7.51  | 996        | 3294          | 52753     | 146.5     | 3644       | 105.3    | 6186      |
| 20030      | Ä10 1327B R0 | 11.2009       | 7.31  | 977        | 3275          | 86551     | 143.2     | 3584       | 86.3     | 5739      |
| 20082      | Ä11 1327B R0 | 04.03.2010    | 7.33  | 976        | 3310          | 85237     | 141.5     | 3564       | 85.8     | 5759      |
| 20492      | Ä12 1327B R0 | 11/18/2010    | 7.41  | 964        | 3278          | 84066     | 141.5     | 3383       | 94.2     | 6085      |
| 22209      | Ä14 1327B R0 | 4/26/2012     | 7.39  | 948        | 3334          | 84320     | 124.2     | 3256       | 73.2     | 6134      |
| 6940       | Ä3 2156B R0  | 19.07.2006    | 7.41  | 1173       | 2254          | 109032    | 235.4     | 3123       | 75.1     | 19505     |
| 6951       | Ä4 2156B R0  | 05.09.2006    | 7.43  | 1229       | 2131          | 115238    | 277.9     | 3508       | 80.2     | 21570     |
| 14039      | Ä5 2156B R0  | 24.01.2007    | 7.4   | 1171       | 2327          | 108975    | 233.0     | 3173       | 82.7     | 19665     |
| 14143      | Ä6-2156B R0  | 28.03.2007    | 7.39  | 1178       | 2393          | 109793    | 223.0     | 3216       | 79.8     | 19693     |
| 14488      | Ä8 2156B R0  | 16.04.2008    | 7.41  | 1048       | 2723          | 93623     | 170.9     | 3057       | 80.0     | 10766     |
| 14827      | Ä9 2156B R0  | 13.05.2009    | 7.55  | 995        | 2491          | 108467    | 227.9     | 3227       | 89.5     | 16282     |
| 20025      | Ä10 2156B R0 | 10.11.2009    | 7.45  | 1211       | 2459          | 110781    | 241.2     | 3322       | 90.0     | 16014     |
| 20077      | Ä11 2156B R0 | 03.03.2010    | 7.47  | 1028       | 2680          | 93999     | 172.0     | 2927       | 107.9    | 11342     |
| 20487      | Ä12 2156B R0 | 11/17/2010    | 7.48  | 1020       | 2606          | 91965     | 172.8     | 2967       | 93.2     | 12114     |
|            | Ä14 2156B R0 | Aquifer empty |       |            |               |           |           |            |          |           |
| 6961       | Ä4 TASF      | 07.09.2006    | 7.89  | 3260       | 103           | 362781    | 1234.5    | 6954       | 82.7     | 125897    |
| 14044      | Ä5 TASF R0   | 24.01.2007    | 7.836 | 3440       | 98            | 372654    | 1205.1    | 6729       | 87.7     | 125444    |
| 14148      | Ä6-TASF R0   | 27.03.2007    | 7.74  | 3330       | 109           | 406929    | 1228.5    | 7071       | 86.3     | 109343    |
| 14493      | Ä8 TASF R0   | 15.04.2008    | 7.93  | 3490       | 107           | 379599    | 1358.4    | 7320       | 84.7     | 95501     |
| 14828      | Ä9 TASF R0   | 13.05.2009    | 7.42  | 4310       | 109           | 380694    | 1252.0    | 7089       | 110.5    | 105498    |
| 20020      | Ä10 TASF R0  | 10.11.2009    | 7.92  | 3500       | 111           | 389352    | 1372.2    | 7277       | 86.8     | 93985     |
| 20072      | Ä11 TASF R0  | 02.03.2010    | 7.93  | 3510       | 114           | 376900    | 1321.8    | 7114       | 95.8     | 104616    |
| 20482      | Ä12 TASF R0  | 11/16/2010    | 7.98  | 3530       | 110           | 383656    | 1327.1    | 7141       | 78.9     | 138104    |
| 22199      | Ä14 TASF R0  | 4/24/2012     | 7.95  | 3565       | 110           | 383092    | 1236.0    | 6809       | 86.3     | 139894    |

Supplementary file 2: Geochemistry table Page 2

| Sicada No. | Location     | Year          | Na $\mu\text{mol/l}$ | Mg $\mu\text{mol/l}$ | K $\mu\text{mol/l}$ | Fe tot $\mu\text{mol/l}$ | Mn $\mu\text{mol/l}$ | Al $\mu\text{mol/l}$ | Sr $\mu\text{mol/l}$ | Ba $\mu\text{mol/l}$ |
|------------|--------------|---------------|----------------------|----------------------|---------------------|--------------------------|----------------------|----------------------|----------------------|----------------------|
| 6945       | Ä3 1327B     | 19.07.2006    | 69827.08             | 5893                 | 695                 | 31                       | 14.3                 | 5                    | 33.2                 | 1                    |
| 6956       | Ä4 1327B R0  | 06.09.2006    | 69379.1              | 5691                 | 655                 | 29                       | 13.8                 | 7                    | 45.3                 | 1                    |
| 14034      | Ä5 1327B R0  | 22.01.2007    | 72308.75             | 6277                 | 679                 | 30                       | 15.5                 | 4                    | 48.5                 | 1                    |
| 14138      | Ä6-1327B R0  | 29.03.2007    | 71020.8              | 6404                 | 654                 | 30                       | 14.5                 | 5                    | 45.9                 | 1                    |
| 14483      | Ä8 1327B R0  | 15.04.2008    | 54796.95             | 4864                 | 1208                | 23                       | 12.7                 | 0                    | 42.7                 | 1                    |
| 14826      | Ä9 1327B R0  | 13.05.2009    | 59487.34             | 5281                 | 1269                | 28                       | 13.6                 | 0                    | 46.8                 | 1                    |
| 20030      | Ä10 1327B R0 | 11.2009       | 53512.83             | 4791                 | 1190                | 28                       | 12.9                 | 0                    | 43.9                 | 1                    |
| 20082      | Ä11 1327B R0 | 04.03.2010    | 78346.11             | 4874                 | 1103                | 23                       | 13.1                 | 5                    | 42.5                 | 1                    |
| 20492      | Ä12 1327B R0 | 11/18/2010    | 60724.66             | 4809                 | 958                 | 28                       | 13.1                 | 5                    | 42.5                 | 1                    |
| 22209      | Ä14 1327B R0 | 4/26/2012     | 59902.45             | 4750                 | 955                 | 27                       | 12.4                 | 6                    | 42.1                 | 1                    |
| 6940       | Ä3 2156B R0  | 19.07.2006    | 71231.61             | 3875                 | 314                 | 8                        | 10.7                 | 7                    | 104.5                | 0                    |
| 6951       | Ä4 2156B R0  | 05.09.2006    | 72980.17             | 3671                 | 302                 | 9                        | 10.6                 | 13                   | 154.7                | 0                    |
| 14039      | Ä5 2156B R0  | 24.01.2007    | 72106.73             | 3837                 | 296                 | 11                       | 12.4                 | 9                    | 147.0                | 0                    |
| 14143      | Ä6-2156B R0  | 28.03.2007    | 70885.83             | 4110                 | 299                 | 10                       | 11.5                 | 10                   | 139.9                | 0                    |
| 14488      | Ä8 2156B R0  | 16.04.2008    | 50739.27             | 3298                 | 546                 | 10                       | 11.5                 | 0                    | 90.6                 | 0                    |
| 14827      | Ä9 2156B R0  | 13.05.2009    | 58744.46             | 3483                 | 628                 | 12                       | 12.0                 | 0                    | 142.8                | 0                    |
| 20025      | Ä10 2156B R0 | 10.11.2009    | 55695.66             | 3212                 | 582                 | 10                       | 11.1                 | 0                    | 140.7                | 0                    |
| 20077      | Ä11 2156B R0 | 03.03.2010    | 78346.11             | 3511                 | 512                 | 10                       | 12.7                 | 53                   | 93.0                 | 1                    |
| 20487      | Ä12 2156B R0 | 11/17/2010    | 58294.41             | 3326                 | 426                 | 12                       | 11.5                 | 3                    | 91.4                 | 0                    |
|            | Ä14 2156B R0 | Aquifer empty |                      |                      |                     |                          |                      |                      |                      |                      |
| 6961       | Ä4 TASF      | 07.09.2006    | 141632.7             | 1537                 | 387                 | 1                        | 4.7                  | 16                   | 1428.1               | 1                    |
| 14044      | Ä5 TASF R0   | 24.01.2007    | 143379.5             | 1398                 | 368                 | 1                        | 5.1                  | 13                   | 1544.8               | 1                    |
| 14148      | Ä6-TASF R0   | 27.03.2007    | 142146.1             | 1585                 | 272                 | 1                        | 3.7                  | 25                   | 1501.3               | 1                    |
| 14493      | Ä8 TASF R0   | 15.04.2008    | 122839.7             | 1209                 | 842                 | 2                        | 3.8                  | 0                    | 1709.5               | 1                    |
| 14828      | Ä9 TASF R0   | 13.05.2009    | 132662.8             | 1263                 | 943                 | 2                        | 3.8                  | 0                    | 1758.8               | 1                    |
| 20020      | Ä10 TASF R0  | 10.11.2009    | 119930.4             | 1159                 | 817                 | 2                        | 3.8                  | 0                    | 1681.0               | 1                    |
| 20072      | Ä11 TASF R0  | 02.03.2010    | 195864.8             | 1288                 | 674                 | 1                        | 5.3                  | 130                  | 1608.3               | 1                    |
| 20482      | Ä12 TASF R0  | 11/16/2010    | 154627.7             | 1203                 | 599                 | 1                        | 3.6                  | 25                   | 1284.5               | 1                    |
| 22199      | Ä14 TASF R0  | 4/24/2012     | 154614.2             | 1189                 | 604                 | 1                        | 3.6                  | 9                    | 1317.0               | 1                    |

Supplementary file 2: Geochemistry table Page 3

| Sicada No. | Location     | Year          | Si $\mu\text{mol/l}$ | O2 $\mu\text{mol/l}$ | H2S $\mu\text{mol/l}$ | NH4 $\mu\text{mol/l}$ | NO3 $\mu\text{mol/l}$ | PO4 $\mu\text{mol/l}$ | DIC $\mu\text{mol/l}$ | DOC $\mu\text{mol/l}$ |
|------------|--------------|---------------|----------------------|----------------------|-----------------------|-----------------------|-----------------------|-----------------------|-----------------------|-----------------------|
| 6945       | Ä3 1327B     | 19.07.2006    | 94.71768             | na                   | na                    | na                    | na                    | na                    | na                    | na                    |
| 6956       | Ä4 1327B R0  | 06.09.2006    | 124.2963             | na                   | na                    | na                    | na                    | na                    | na                    | na                    |
| 14034      | Ä5 1327B R0  | 22.01.2007    | 179.0484             | 13                   | na                    | na                    | na                    | na                    | na                    | na                    |
| 14138      | Ä6-1327B R0  | 29.03.2007    | 92.03079             | 5                    | na                    | na                    | na                    | 1                     | na                    | na                    |
| 14483      | Ä8 1327B R0  | 15.04.2008    | 191.2053             | 2                    | 2                     | na                    | na                    | 1                     | 858.3                 | 258                   |
| 14826      | Ä9 1327B R0  | 13.05.2009    | 208.6523             | 15                   | 1                     | na                    | 0.0                   | na                    | 1191.7                | 633                   |
| 20030      | Ä10 1327B R0 | 11.2009       | 190.8492             | 14                   | 2                     | 232                   | 0.4                   | na                    | 1583.3                | 892                   |
| 20082      | Ä11 1327B R0 | 04.03.2010    | 206.516              | 11                   | 1                     | 228                   | 3.0                   | na                    | 1525.0                | 933                   |
| 20492      | Ä12 1327B R0 | 11/18/2010    | 206.516              | 11                   | 1                     | 214                   | 1.2                   | na                    | 1691.7                | 492                   |
| 22209      | Ä14 1327B R0 | 4/26/2012     | 202.3208             | 2                    | 2                     | 215                   | na                    | na                    | na                    | na                    |
| 6940       | Ä3 2156B R0  | 19.07.2006    | 84.19899             | 0                    | na                    | na                    | na                    | na                    | na                    | na                    |
| 6951       | Ä4 2156B R0  | 05.09.2006    | 131.0538             | 0                    | na                    | na                    | na                    | na                    | na                    | na                    |
| 14039      | Ä5 2156B R0  | 24.01.2007    | 174.9837             | 17                   | na                    | na                    | na                    | na                    | na                    | na                    |
| 14143      | Ä6-2156B R0  | 28.03.2007    | 39.6757              | 7                    | na                    | na                    | na                    | 1                     | na                    | na                    |
| 14488      | Ä8 2156B R0  | 16.04.2008    | 186.9326             | 3                    | 1                     | na                    | na                    | 1                     | 616.7                 | 208                   |
| 14827      | Ä9 2156B R0  | 13.05.2009    | 194.0538             | 19                   | 1                     | na                    | na                    | na                    | 1291.7                | 492                   |
| 20025      | Ä10 2156B R0 | 10.11.2009    | 186.2204             | 8                    | 2                     | 35                    | 0.4                   | na                    | 975.0                 | 525                   |
| 20077      | Ä11 2156B R0 | 03.03.2010    | 188.3568             | 10                   | 1                     | 37                    | 0.4                   | na                    | 1541.7                | 1117                  |
| 20487      | Ä12 2156B R0 | 11/17/2010    | 199.3622             | 3                    | 1                     | 40                    | 1.0                   | na                    | 1425.0                | 408                   |
|            | Ä14 2156B R0 | Aquifer empty |                      |                      |                       |                       |                       |                       |                       |                       |
| 6961       | Ä4 TASF      | 07.09.2006    | 49.91928             | 0                    | na                    | na                    | na                    | na                    | na                    | na                    |
| 14044      | Ä5 TASF R0   | 24.01.2007    | 57.51544             | 12                   | na                    | na                    | na                    | na                    | na                    | na                    |
| 14148      | Ä6-TASF R0   | 27.03.2007    | 162.9121             | 2                    | na                    | na                    | na                    | 1                     | na                    | na                    |
| 14493      | Ä8 TASF R0   | 15.04.2008    | 136.0157             | 3                    | na                    | na                    | na                    | 1                     | 66.7                  | 692                   |
| 14828      | Ä9 TASF R0   | 13.05.2009    | 132.099              | 3                    | na                    | na                    | na                    | na                    | 75.0                  | 233                   |
| 20020      | Ä10 TASF R0  | 10.11.2009    | 129.9626             | 8                    | 0                     | 1                     | 0.4                   | na                    | 83.3                  | 233                   |
| 20072      | Ä11 TASF R0  | 02.03.2010    | 92.22006             | 6                    | 0                     | 1                     | 0.4                   | na                    | 125.0                 | 925                   |
| 20482      | Ä12 TASF R0  | 11/16/2010    | 145.3668             | 4                    | 1                     | 7                     | 1.0                   | na                    | 133.3                 | 183                   |
| 22199      | Ä14 TASF R0  | 4/24/2012     | 123.9261             | 4                    | 1                     | 1                     | na                    | na                    | na                    | na                    |

| Sicada No. | Location     | Year          | DN $\mu\text{mol/l}$ | DON | DOC/DN | DOC/DN |
|------------|--------------|---------------|----------------------|-----|--------|--------|
| 6945       | Ä3 1327B     | 19.07.2006    | na                   | na  | na     | na     |
| 6956       | Ä4 1327B R0  | 06.09.2006    | na                   | na  | na     | na     |
| 14034      | Ä5 1327B R0  | 22.01.2007    | na                   | na  | na     | na     |
| 14138      | Ä6-1327B R0  | 29.03.2007    | na                   | na  | na     | na     |
| 14483      | Ä8 1327B R0  | 15.04.2008    | 171.4                | 171 | 2      | 2      |
| 14826      | Ä9 1327B R0  | 13.05.2009    | 64.3                 | 64  | 10     | 10     |
| 20030      | Ä10 1327B R0 | 11.2009       | 321.4                | 89  | 3      | 10     |
| 20082      | Ä11 1327B R0 | 04.03.2010    | 300                  | 69  | 3      | 14     |
| 20492      | Ä12 1327B R0 | 11/18/2010    | na                   | na  | na     | na     |
| 22209      | Ä14 1327B R0 | 4/26/2012     | na                   |     | na     | na     |
| 6940       | Ä3 2156B R0  | 19.07.2006    | na                   | na  | na     | na     |
| 6951       | Ä4 2156B R0  | 05.09.2006    | na                   | na  | na     | na     |
| 14039      | Ä5 2156B R0  | 24.01.2007    | na                   | na  | na     | na     |
| 14143      | Ä6-2156B R0  | 28.03.2007    | na                   | na  | na     | na     |
| 14488      | Ä8 2156B R0  | 16.04.2008    | 35.7                 | 36  | 6      | 6      |
| 14827      | Ä9 2156B R0  | 13.05.2009    | 164.3                | 164 | 3      | 3      |
| 20025      | Ä10 2156B R0 | 10.11.2009    | 57.1                 | 22  | 9      | 24     |
| 20077      | Ä11 2156B R0 | 03.03.2010    | 71.4                 | 34  | 16     | 33     |
| 20487      | Ä12 2156B R0 | 11/17/2010    | na                   | na  | na     | na     |
|            | Ä14 2156B R0 | Aquifer empty |                      |     |        |        |
| 6961       | Ä4 TASF      | 07.09.2006    | na                   | na  | na     | na     |
| 14044      | Ä5 TASF R0   | 24.01.2007    | na                   | na  | na     | na     |
| 14148      | Ä6-TASF R0   | 27.03.2007    | na                   | na  | na     | na     |
| 14493      | Ä8 TASF R0   | 15.04.2008    | 21.4                 | 21  | 32     | 32     |
| 14828      | Ä9 TASF R0   | 13.05.2009    | 21.4                 | 21  | 11     | 11     |
| 20020      | Ä10 TASF R0  | 10.11.2009    | 14.3                 | 13  | 16     | 18     |
| 20072      | Ä11 TASF R0  | 02.03.2010    | 14.3                 | 13  | 65     | 70     |
| 20482      | Ä12 TASF R0  | 11/16/2010    | 14.3                 | 6   | 13     | 32     |
| 22199      | Ä14 TASF R0  | 4/24/2012     | na                   | na  | na     | na     |
