# Supplementary material for: Connectivity to the surface determines diversity patterns in subsurface aquifers of the Fennoscandian shield
Source: PubMed Central journal article supplement — ISME J. 2016 Mar 29;10(10):2447–58. doi: 10.1038/ismej.2016.36 (PMC5030689; doi:10.1038/ismej.2016.36), 2016-03-29
Supplement: ismej201636x4.pdf [file ismej201636x4.pdf]

| Pathway Function Gene                        | PFam BLAST score                                                  |                 |                  |                                              |
|----------------------------------------------|-------------------------------------------------------------------|-----------------|------------------|----------------------------------------------|
| sulfate reduction                            | Sulfite reductase, dissimilatory-type                             | dsrAB           | PF01077, PF03460 | E-value: 0.0 Score: 1,579 Ident.: 72.0%      |
| sulfate reduction                            | Phosphoadesine phosphosulfate reductase                           | aps             | PF01507          | E-value: 2.7e-68 Score: 553 Ident.: 49.0%    |
| sulfate reduction                            | Cytochrome subunit of sulfide dehydrogenase                       | soxD            | PF00034          | E-value: 4.2e-32 Score: 302 Ident.: 37.0%    |
| sulfate reduction                            | Thioredoxin reductase                                             | soxF            | PF07992, PF00355 | E-value: 1.3e-85 Score: 659 Ident.: 62.0%    |
| sulfate reduction                            | Thiol:disulfide interchange protein                               | DsbD soxV, DsbD | PF02683          | E-value: 8.3e-141 Score: 1,086 Ident.: 51.0% |
| sulfate reduction                            | Thioredoxin-2                                                     | soxW            | PF13098          | E-value: 6.1e-26 Score: 247 Ident.: 53.0%    |
| methagenesis from CO2 & H2                   | Formate dehydrogenase subunit alpha                               | fwdB            | PF00384          | E-value: 340e-177 Score: 1,398 Ident.: 33.6% |
| methagenesis from methanol                   | Methylated-thiol-coenzyme M methyltransferase                     | mtaA            | PF01208          | E-value: 1.7e-48 Score: 436 Ident.: 35.0%    |
| methagenesis from acetate                    | Phosphate acetyltransferase, subunit A                            | pta             | PF07085          | E-value: 6.5e-166 Score: 1,289 Ident.: 41.0% |
| methagenesis from acetate                    | Phosphate acetyltransferase, subunit B                            | pta             | PF01515          | E-value: 8e-152 Score: 1,126 Ident.: 63.0%   |
| methagenesis from acetate                    | Acetate kinase                                                    | ackA            | PF00871          | E-value: 3.4e-154 Score: 1,153 Ident.: 58.0% |
| ammonia assimilation cycle                   | Ferredoxin-dependent glutamate synthase                           | gltB            | PF00310          | E-value: 0.0 Score: 4,185 Ident.: 54.0%      |
| ammonia assimilation cycle                   | Ferredoxin-dependent glutamate synthase                           | gltB            | PF04898          | E-value: 0.0 Score: 4,175 Ident.: 54.0%      |
| ammonia assimilation cycle                   | Ferredoxin-dependent glutamate synthase                           | gltB            | PF01645          | E-value: 0.0 Score: 4,185 Ident.: 54.0%      |
| ammonia assimilation cycle                   | Ferredoxin-dependent glutamate synthase                           | gltB            | PF01493          | E-value: 0.0 Score: 4,175 Ident.: 54.0%      |
| Nitrogen fixation                            | Nitrite reductase                                                 | nirK            | PF07732          | E-value: 6.4e-97 Score: 777 Ident.: 51.0%    |
| reductive acetyl-CoA                         | pathway CO dehydrogenase/acetyl-CoA synthase complex beta subunit | CdhC            | PF03598          | E-value: 0.0 Score: 1,581 Ident.: 46.0%      |
| Glucose fermentation                         | glucose-6-phosphate isomerase                                     | pgi             | PF00342          | E-value: 1.3e-55, score 499, ident: 40%      |
| Glucose fermentation                         | 6-phosphofructokinase                                             | Pfk             | PF00365          | E-value: 9.00e-98 Score: 298, Ident: 45.86   |
| Glucose fermentation                         | fructose-bisphosphate aldolase                                    | fda             | PF01791          | E-value:8.00e-171 score:484, Ident:63.82     |
| Glucose fermentation                         | fructose-bisphosphate aldolase                                    | fbaA            | PF01116          | E-value: 0.0, Score: 1,506, Ident.: 84.0%    |
| Glucose fermentation                         | phosphoglycerate kinase                                           | pgk/tpi         | PF00162          | E-value: 0.0, Score: 2,001, Ident.: 100.0%   |
| Glucose fermentation                         | 2,3-bisphosphoglycerate-dependent phosphoglycerate mutase         | gpmA            | PF00300          | E-value: 4e-88, Score: 679, Ident.: 83.0%    |
| pyruvate fermentation to acetate and lactate | pyruvate ferredoxin oxidoreductase, gamma subunit                 | porC            | PF01558          | E-value: 0.0 Score: 2,629 Ident.: 100.0%     |
| pyruvate fermentation to acetate and lactate | pyruvate ferredoxin oxidoreductase, delta subunit                 | porD            | PF00037          | E-value: 0.0 Score: 3,258 Ident.: 66.0%      |
| Carbohydrate metabolism                      | ribokinase                                                        | rbsK            | PF00294          | E-value: 0.0 Score: 1,618 Ident.: 100.0%     |
| Carbohydrate metabolism                      | glycogen debranching enzyme                                       | malQ            | PF02446          | E-value: 0.0 Score: 3,441 Ident.: 100.0%     |
| Carbohydrate metabolism                      | starch phosphorylase                                              | glgA            | PF08323          | E-value: 0.0 Score: 2,279 Ident.: 100.0%     |
| Carbohydrate metabolism                      | starch phosphorylase                                              | glgA            | PF00534          | E-value: 0.0 Score: 1,509 Ident.: 74.0%      |
| Carbohydrate metabolism                      | glycogen(starch) synthase, 2 copies                               | Rv3032          | PF13579          | E-value: 0.0 Score: 2,279 Ident.: 100.0%     |
| Carbohydrate metabolism                      | glycogen(starch) synthase, 2 copies                               | Rv3032          | PF00534          | E-value: 0.0 Score: 1,509 Ident.: 74.0%      |
| Hydrogenase activity                         | hydrogenase expression/formation protein HypC                     | hypC            | PF01455          | E-value: 9.1e-58 Score: 467 Ident.: 100.0%   |
| Hydrogenase activity                         | hydrogenase expression/formation protein HypD                     | hypD            | PF01924          | E-value: 0.0 Score: 1,453 Ident.: 100.0%     |
| Hydrogenase activity                         | hydrogenase expression regulatory protein HypF                    | HypF            | PF00708          | E-value: 0.0 Score: 2,489 Ident.: 64.7%      |
| Hydrogenase activity                         | hydrogenase expression regulatory protein HypF                    | HypF            | PF01300          | E-value: 0.0 Score: 2,489 Ident.: 64.7%      |
| Hydrogenase activity                         | hydrogenase expression regulatory protein HypF                    | HypF            | PF07503          | E-value: 0.0 Score: 2,489 Ident.: 64.7%      |
| Nitrogen fixation                            | 4Fe-4S iron sulfur cluster binding proteins                       | nifH            | PF00142          |                                              |
| Nitrogen fixation                            | Nickel-dependent hydrogenase                                      | NifeSe          | PF00374          |                                              |
| Nitrogen fixation                            | NifU-like domain                                                  | nifU            | PF01106          |                                              |
| Nitrogen fixation                            | NifU-like N terminal domain                                       | nifU            | PF01592          |                                              |
