# Supplementary material for: Connectivity to the surface determines diversity patterns in subsurface aquifers of the Fennoscandian shield
Source: PubMed Central journal article supplement — ISME J. 2016 Mar 29;10(10):2447–58. doi: 10.1038/ismej.2016.36 (PMC5030689; doi:10.1038/ismej.2016.36), 2016-03-29
Supplement: ismej201636x5.pdf [file ismej201636x5.pdf]

| Pathway Function        | Gene                                                              | gene    | Pfam     | BLAST score                                  |
|-------------------------|-------------------------------------------------------------------|---------|----------|----------------------------------------------|
| sulfate reduction       | Sulfite reductase, dissimilatory-type subunit beta                | dsrAB   | PF01077  | E-value: 4.3E-84 Score: 666 Ident.: 56.5%    |
| sulfate reduction       | Sulfite reductase, dissimilatory-type subunit alpha               | dsrAB   | PF03460  | E-value: 3.2E-45 Score: 436 Ident.: 27.7%    |
| sulfate reduction       | Phosphoadesine phosphosulfate reductase                           | aps     | PF01507  | E-value: 310E-105 Score: 789 Ident.: 62.9%   |
| sulfide oxidation       | Thioredoxin reductase                                             | soxF    | PF07992  | E-value: 13E-93 Score: 727 Ident.: 47.8%     |
| sulfide oxidation       | Thioredoxin-2                                                     | soxW    | PF13098  | E-value: 460E-51 Score: 398 Ident.: 71.2%    |
| sulfide oxidation       | Pyridine nucleotide-disulphide oxidoreductase                     | sqr     | PF07992  | E-value: 1.2E-72 Score: 600 Ident.: 45.0%    |
| methanogenesis from     | CO2 & H2 Formate dehydrogenase subunit alpha                      | fwdB    | PF00384  | E-value: 340E-177 Score: 1,398 Ident.: 33.6% |
| methanogenesis from     | methanol Methylated-thiol--coenzyme M methyltransferase           | mtaB    | PF12176  | E-value: 1.3E-84 Score: 682 Ident.: 50.9%    |
| methanogenesis from     | acetate Phosphate acetyltransferase                               | pta     | PF01515  | E-value: 460E-114 Score: 872 Ident.: 60.2%   |
| methanogenesis from     | acetate Acetate kinase                                            | ackA    | PF00871  | E-value: 27E-102 Score: 800 Ident.: 46.3%    |
| Denitrification         | Multicopper oxidase                                               | nirK    | PF00394  | E-value: 780E-108 Score: 848 Ident.: 38.4%   |
| Denitrification         | Copper-containing nitrite reductase                               |         | PF07732  | E-value: 5.6E-36 Score: 361 Ident.: 34.8%    |
|                         |                                                                   |         | PF00310, | PF04898, PF0164,                             |
| ammonia assimilation    | cycle II, energy metabolism                                       | gltB    | PF014935 | E-value: 0.0 Score: 4,229 Ident.: 54.9%      |
| reductive acetyl-CoA    | Ferredoxin-dependent glutamate synthase                           | CdhC    | PF03598  | E-value: 430E-162 Score: 1,223 Ident.: 56.0% |
| Glucose fermentation    | pathway CO dehydrogenase/acetyl-CoA synthase complex beta subunit | pgi     | PF00342  | E-value: 0.0 Score: 1,992 Ident.: 70.0%      |
| Glucose fermentation    | glucose-6-phosphate isomerase                                     | PFk     | PF00365  | E-value: 1.2E-150 Score: 1,178 Ident.: 43.9% |
| Glucose fermentation    | 6-phosphofructokinase                                             | fda     | PF01791  | E-value: 210E-96 Score: 729 Ident.: 59.8%    |
| Glucose fermentation    | fructose-bisphosphate aldolase                                    | fbaA    | PF01116  | E-value: 0.0 Score: 1,580 Ident.: 85.3%      |
| Carbohydrate metabolism | fructose-bisphosphate aldolase                                    | pgk/tpi | PF00162  | E-value: 0.0 Score: 1,655 Ident.: 82.3%      |
| Carbohydrate metabolism | phosphoglycerate kinase                                           | gpmA    | PF00300  | E-value: 4.1E-129 Score: 948 Ident.: 85.3%   |
| Carbohydrate metabolism | 2,3-bisphosphoglycerate-dependent phosphoglycerate mutase         | rbsK    | PF00294  | E-value: 74E-48 Score: 419 Ident.: 37.0%     |
| Carbohydrate metabolism | ribokinase                                                        | porC    | PF01558  | E-value: 3.7E-30 Score: 282 Ident.: 43.4%    |
| Pyruvate to acetyl-CoA  | pyruvate ferredoxin oxidoreductase, gamma subunit                 | hypA    | PF01155  | E-value: 250E-57 Score: 442 Ident.: 68.1%    |
| Hydrogenase activity    | hydrogenase accessory protein HypA                                | hypC    | PF01455  | E-value: 5.4E-18 Score: 176 Ident.: 50.0%    |
| Hydrogenase activity    | hydrogenase expression/formation protein                          | hypD    | PF01924  | E-value: 0.0 Score: 1,768 Ident.: 87.0%      |
| Hydrogenase activity    | hydrogenase expression/formation protein                          | hypF    | PF07503  | E-value: 0.0 Score: 2,489 Ident.: 64.7%      |
| Hydrogenase activity    | hydrogenase expression regulatory protein                         | nifH    | PF00142  |                                              |
| Nitrogen fixation       | 4Fe-4S iron sulfur cluster binding proteins                       | NifeSe  | PF00374  |                                              |
| Nitrogen fixation       | Nickel-dependent hydrogenase                                      | nifU    | PF01106  |                                              |
| Nitrogen fixation       | NifU-like domain                                                  | nifU    | PF01592  |                                              |
| Nitrogen fixation       | NifU-like N terminal domain                                       |         |          |                                              |
