# Supplementary figures and images for: Connectivity to the surface determines diversity patterns in subsurface aquifers of the Fennoscandian shield
Source: PubMed Central journal article supplement — ISME J. 2016 Mar 29;10(10):2447–58. doi: 10.1038/ismej.2016.36 (PMC5030689; doi:10.1038/ismej.2016.36), 2016-03-29

### Shallow aquifer: HA1327

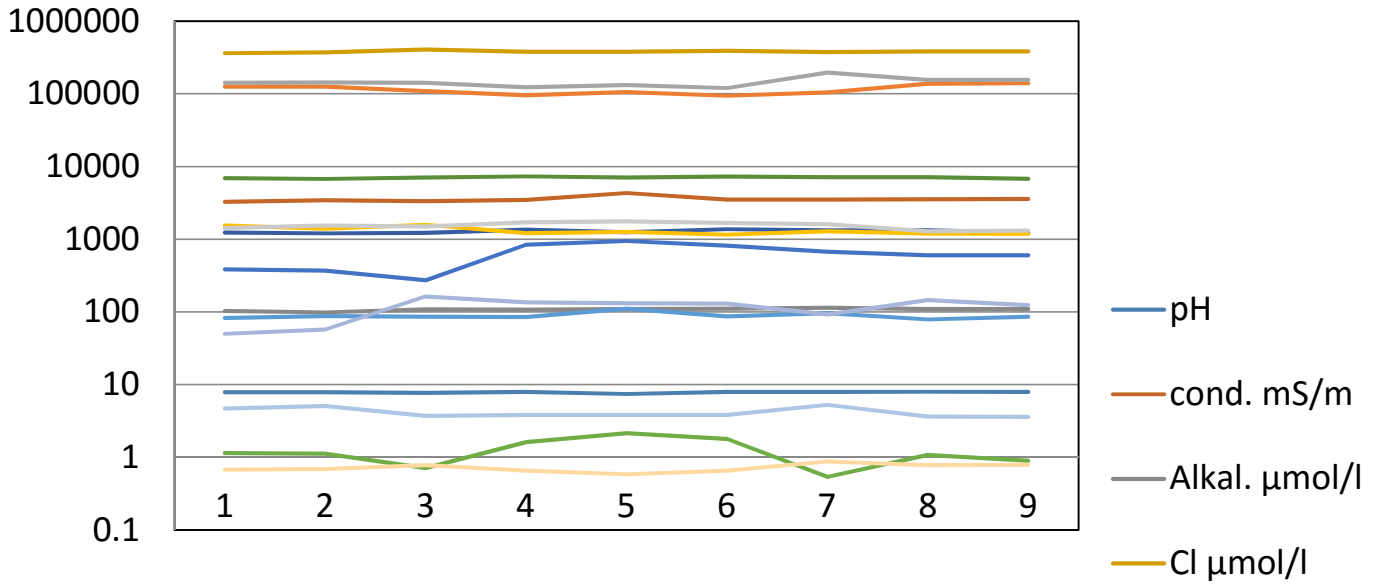

### Intermediate aquifer: KA2162B:1

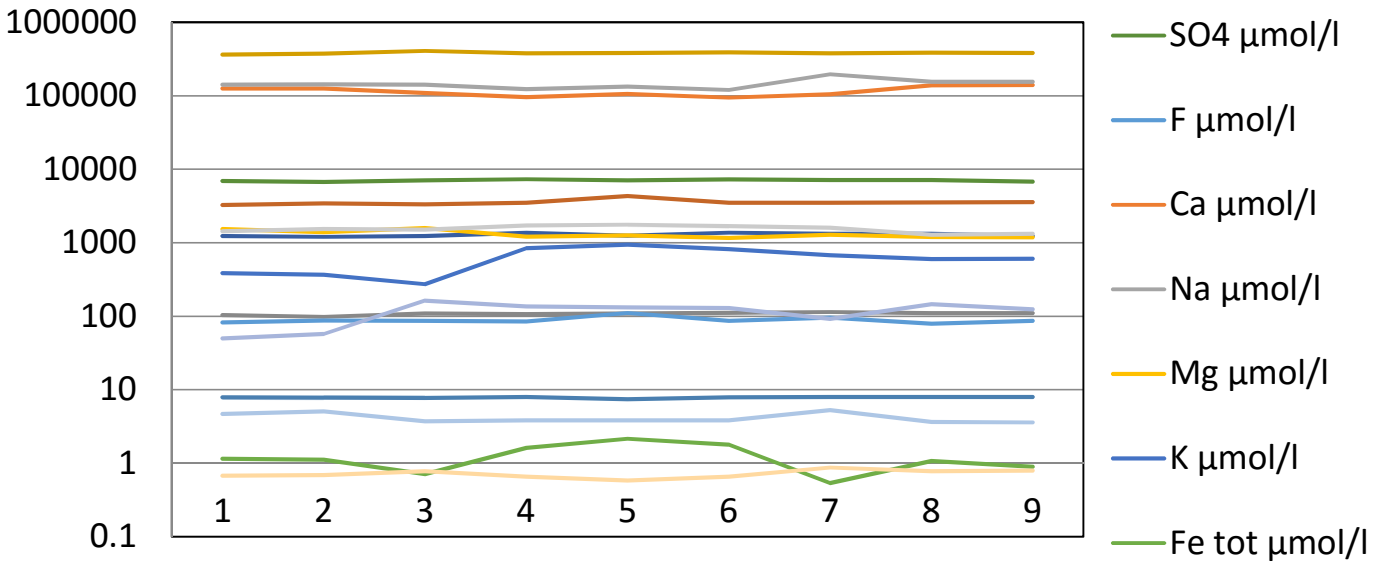

### Deep aquifer: KF0069A01

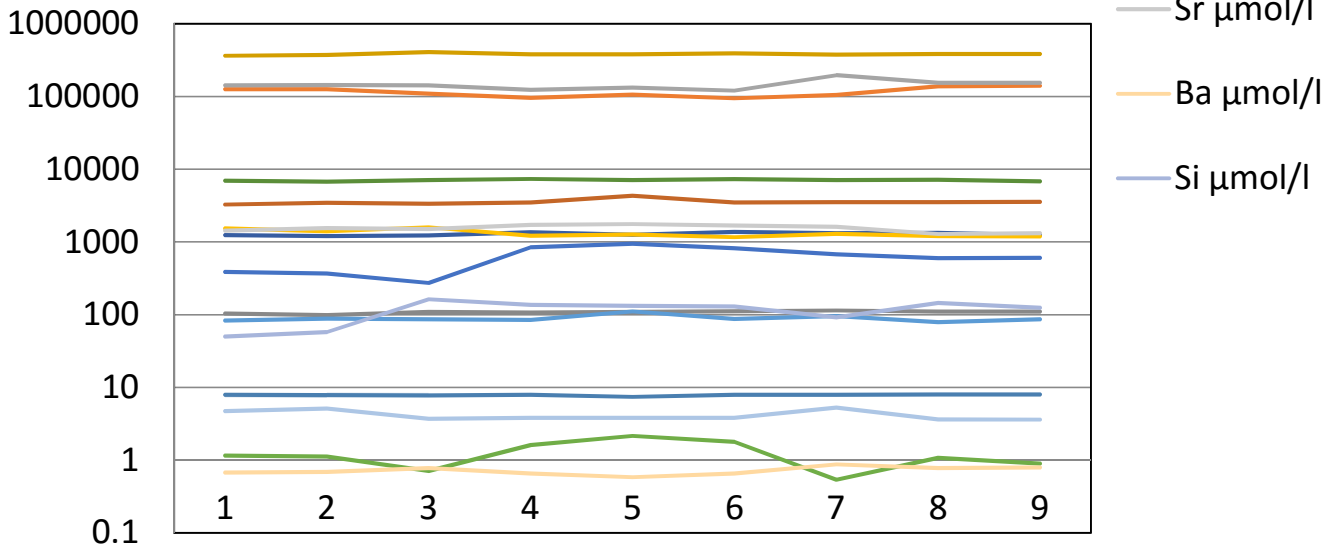

Supplement: ismej201636x3.pdf [file ismej201636x3.pdf]
